# Supplementary material
Source: Springer Nature journal article supplement (https://www.springermedizin.de/resource/supplementary/12990_2009_305_MOESM2_ESM.pdf/9612992)
Supplement: MOESM2 [file 9612992]

**A**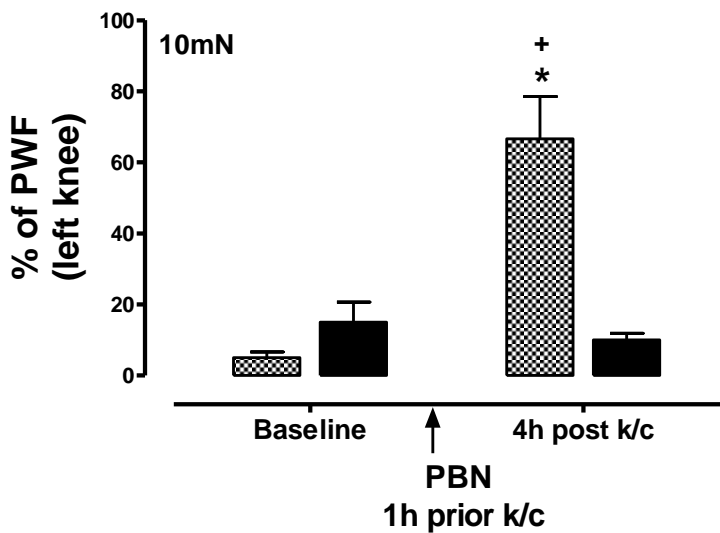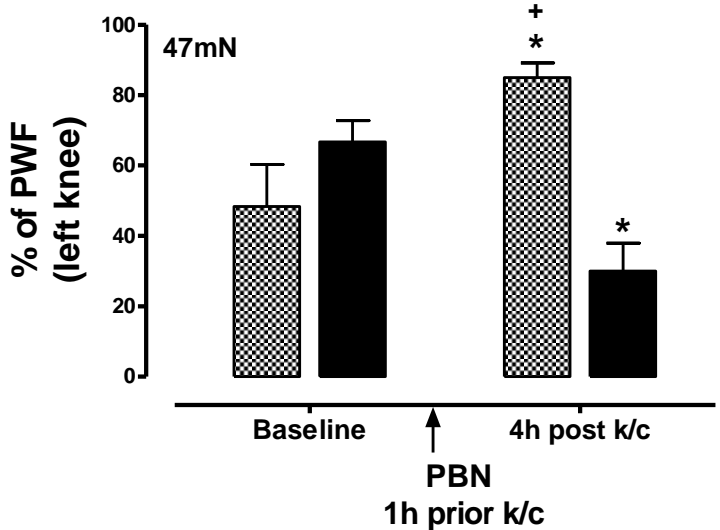

▨ Saline/Arth (L, n=4)

■ PBN/Arth (L, n=4)

\*  $p < 0.05$  (vs. baseline)

+  $p < 0.05$  (vs. PBN/Arth)

**B**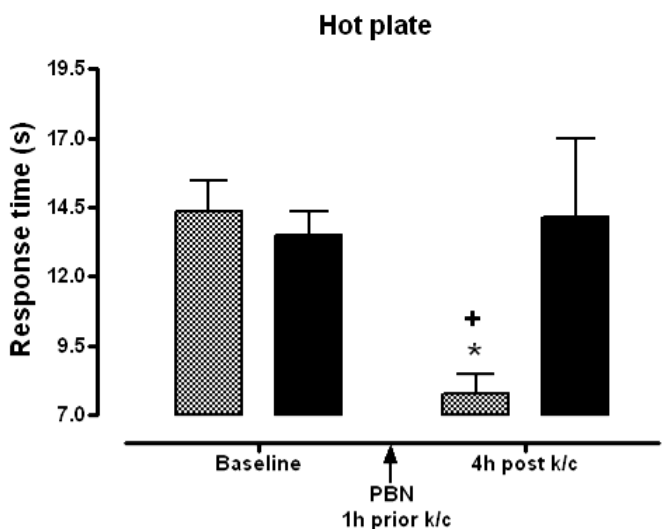

▨ Saline/Arth (n=4)

■ PBN/Arth (n=4)

\*  $p < 0.05$  (vs. baseline)

+  $p < 0.05$  (vs. PBN/Arth)
